limiting toxicity with pembrolizumab 200mg IV q3weeks. The median number of doses given per patient was 5 (range 2 to 12). Severe adverse events possibly related to the study treatment included a grade 3 rash and diarrhea in 1 patient (11%) and grade 3 pneumonitis and hypotension in another patient (11%). No grade 3/4 intracranial edema deemed related to study treatment was observed. Best response was stable disease. One (11%), 2 (22%), and 1 (11%) GBM patients have not progressed for 20.7, 8, and 4 months, respectively. One (11%) anaplastic astrocytoma patient has not progressed for 12 months. **CONCLUSIONS:** LITT plus pembrolizumab 200mg IV q3weeks is generally well tolerated in patients with recurrent high-grade glioma. Prolonged PFS was observed in several patients. Updated study data will be presented. The study should proceed to the planned phase 2.

#### ATIM-18. A PHASE I TRIAL OF HYPOFRACTIONATED STEREOTACTIC IRRADIATION (HSRT) WITH PEMBROLIZUMAB AND BEVACIZUMAB IN PATIENTS WITH RECURRENT HIGH GRADE GLIOMA (NCT02313272)

Solmaz Sahebjam<sup>1</sup>, Peter Forsyth<sup>1</sup>, John Arrington<sup>1</sup>, Michael Jaglal<sup>1</sup>, Nam D. Tran<sup>1</sup>, Arnold B. Etame<sup>1</sup>, Melissa Wicklund<sup>1</sup>, Ali Drury-Sibiga<sup>1</sup>, Wendy Long<sup>1</sup>, Brittany Evernden<sup>1</sup>, Tyra Gatewood<sup>1</sup>, Robert Macaulay<sup>1</sup>, Prakash Chinnaiyan<sup>2</sup> and Michael Yu<sup>1</sup>; <sup>1</sup>H. Lee Moffitt Cancer Center & Research Institute, Tampa, FL, USA, <sup>2</sup>Department of Radiation Oncology, Beaumont Health and Oakland University School of Medicine, Royal Oak, MI, USA

**BACKGROUND:** There is strong pre-clinical evidence for the combination of PD-1 blockade with radiotherapy and anti-VEGF therapy. Herein, we present safety and efficacy data from a phase 1 study combining pembrolizumab, an anti-PD-1 monoclonal antibody, with hypofractionated stereotactic irradiation (HSRT) and bevacizumab in recurrent high grade glioma. **METHODS:** This phase I study (3 + 3 design) explored the safety, tolerability, recommended phase II dose (RP2D), and antitumor activity of pembrolizumab administered concurrently with HSRT and bevacizumab. Adult patients with recurrent glioblastoma or anaplastic astrocytoma (maximum diameter of target lesion  $\leq$  3.5 cm) were eligible. Eligible patients received HSRT to the recurrent tumor (30 Gy in 5 fractions) combined with bevacizumab (10 mg/kg, Q2W) and pembrolizumab (100 mg or 200 mg intravenously based on dose level, Q3W). Two dose levels of pembrolizumab were explored and 20 patients were treated at RP2D. Treatment continued until disease progression or unacceptable toxicity. **RESULTS:** Twenty three patients with recurrent glioblastoma have been treated on this study (3 patients at 100 mg and 20 patients at 200 mg dose levels). Five patients had previous tumor progression on bevacizumab. Combination of HSRT with pembrolizumab (200 mg every 3 weeks) and bevacizumab was generally well tolerated. The most common toxicities were grade 1 fatigue and grade 1 proteinuria. No treatment-related neurologic adverse events were observed. In 1 patient, study treatment was discontinued due to grade 3 elevation of liver transaminases. Durable objective responses (complete response + partial response  $\geq$  6 months) were observed in 53% of patients. The overall survival rate (at the time of abstract submission) at 6 and 12 months were 94% (16 out of 17 patients) and 64% (7 out of 11 patients), respectively. **CONCLUSION:** Combination of HSRT with pembrolizumab (200 mg every 3 weeks) and bevacizumab is safe. Clinical activity of this combination therapy is encouraging.

#### ATIM-19. POPULATION PHARMACOKINETIC (PPK) ANALYSIS OF NIVOLUMAB FLAT AND WEIGHT-BASED DOSING REGIMENS AND ASSOCIATIONS WITH SAFETY IN PATIENTS WITH RECURRENT GLIOBLASTOMA (RGBM) TREATED IN CHECKMATE 143

Jun Shen<sup>1</sup>, Matthew Hruska<sup>1</sup>, Ricardo Zwirter<sup>1</sup>, Von Potter<sup>1</sup>, Prashni Paliwal<sup>1</sup>, Amit Roy<sup>1</sup>, Akintunde Bello<sup>1</sup>, Satyendra Suryawanshi<sup>1</sup> and Michael Lim<sup>2</sup>; <sup>1</sup>Bristol-Myers Squibb, Princeton, NJ, USA, <sup>2</sup>The Johns Hopkins Hospital, Baltimore, MD, USA

**BACKGROUND:** Nivolumab 3 mg/kg Q2W was well tolerated in rGBM in CheckMate 143 (NCT02017717). It is unknown if nivolumab PK will differ in rGBM vs other tumor types; therefore, a PPK analysis was performed to compare nivolumab PK in patients with rGBM vs those with NSCLC. Additionally, this analysis was used to determine if exposure or safety will differ with flat (240 mg Q2W) vs weight-based dosing (both approved in multiple tumor types) in rGBM. **METHODS:** Nivolumab PK was characterized using samples from patients with rGBM (n=161; CheckMate 143) and NSCLC (n=654; 5 studies). A PPK model incorporating baseline covariates was developed. Post-hoc individual parameters were used to predict exposure with flat vs weight-based dosing. Safety was assessed per CTCAE v4.0. **RESULTS:** Nivolumab PK was well described by a 2-compartment model with time-varying clearance. Baseline clearance was 45% lower in rGBM (0.149 L/d) than in NSCLC (0.271 L/d); magnitude of clearance decrease over time was also lower (8% vs 30%).

Nivolumab exposures (steady-state trough serum concentration) were 45% higher in rGBM than in NSCLC (97.2 vs 66.9 ug/mL); similar exposures (100 ug/mL) were predicted with flat dosing in rGBM. Across exposure quartiles ( $<103.5$  [n=37];  $\geq 103.5$ – $<117.1$  [n=39];  $\geq 117.1$ – $<131.2$  [n=37];  $\geq 131.2$  ug/mL [n=38]) in rGBM (weight-based dosing), AE incidence (any grade) varied from 94.6% to 97.3%, with the incidence of grade  $\geq 3$  AEs being 48.6%, 33.3%, 51.4%, and 52.6%, respectively. **CONCLUSIONS:** Nivolumab exposures were higher in rGBM than in NSCLC, which has exposures similar to melanoma and RCC, but were within the range evaluated and considered safe in a dose-escalation study (NCT00730639). Increased nivolumab exposure in rGBM was not associated with an increase in grade  $\geq 3$  AEs. Similar exposures were predicted with nivolumab 240-mg and 3-mg/kg Q2W regimens, suggesting that flat dosing is a viable regimen for future GBM studies.

#### ATIM-20. CLINICAL OUTCOMES WITH IPILIMUMAB IN COMBINATION WITH BEVACIZUMAB IN PATIENTS WITH RECENTLY DIAGNOSED GLIOBLASTOMA - A RETROSPECTIVE COHORT REVIEW

Nicholas Brown<sup>1,2</sup>, Thomas Carter<sup>1,2</sup>, Denise Cohn-Brown<sup>3</sup> and Paul Mulholland<sup>1,2</sup>; <sup>1</sup>University College London Hospitals NHS Foundation Trust, London, United Kingdom, <sup>2</sup>UCL Cancer Institute, University College London, London, United Kingdom, <sup>3</sup>Harley Street Clinic at University College Hospital, London, United Kingdom

**BACKGROUND:** Median survival for patients with glioblastoma remains under a year. Whilst there is accumulating interest in the role of checkpoint inhibitors in newly diagnosed glioblastoma, the results of clinical trials are awaited to establish clinical efficacy. We have previously presented clinical outcomes in patients with relapsed glioblastoma treated with the anti-CTLA-4 monoclonal antibody ipilimumab in combination with the anti-VEGF monoclonal antibody bevacizumab. **METHODS:** We retrospectively identified patients with newly diagnosed WHO grade IV glioma who received treatment with ipilimumab and bevacizumab at our centre between March 2015 and March 2017. Baseline demographics, tumour characteristics, concurrent therapy, radiological responses, and survival data were analysed. **RESULTS:** Nineteen patients were identified, 18 with glioblastoma and one with a glioneuronal tumour (Grade IV). Median age was 52 years (range 22–85) and 79% were male. 5% (1/19) had an IDH mutation, and 38% (6/16) had MGMT promotor methylation. Ipilimumab (3mg/kg, 3 weekly, 4 cycles) and bevacizumab (10mg/kg 2 weekly), given with concurrent G-CSF or GM-CSF were commenced after radiotherapy (except in one patient who did not receive radiotherapy). 58% of patients had prior surgical debulking (42% biopsy only), 79% had prior radical radiotherapy with concomitant temozolomide, 16% had short course radiotherapy, and 5% did not receive radiotherapy. 84% of patients received adjuvant temozolomide, and 89% received concurrent valganciclovir. In those with visible disease on pre-treatment MRI, 62% (8/13) had a radiological response. At time of analysis, 63% of patients remained alive, and 58% were alive and progression free. Median follow up was 15 months. Median survival in patients who had had debulking surgery was 23 months, and median survival in those who had a biopsy only was 16 months. **CONCLUSION:** This combination requires prospective evaluation in clinical trials to formally determine efficacy. Data on this cohort continues to be collected and will be updated.

#### ATIM-21. INTRAVENOUS DELIVERY OF TOCA 511 IN PATIENTS WITH HIGH GRADE GLIOMA RESULTS IN QUANTIFIABLE EXPRESSION OF CYTOSINE DEAMINASE IN TUMOR TISSUE

Tobias Walbert<sup>1</sup>, Daniela Bota<sup>2</sup>, Michael Vogelbaum<sup>3</sup>, Steven Kalkanis<sup>1</sup>, Linda Liau<sup>4</sup>, Tom Mikkelsen<sup>1,5</sup>, Harry Gruber<sup>6</sup>, Jolene Shorr<sup>6</sup>, Maria Rodriguez-Aquirre<sup>6</sup>, Derek Ostertag<sup>6</sup>, Leah Mitchell<sup>6</sup>, Douglas Jolly<sup>6</sup> and Timothy Cloughesy<sup>4</sup>; <sup>1</sup>Henry Ford Health System, Detroit, MI, USA, <sup>2</sup>UC Irvine Medical Center, Orange, CA, USA, <sup>3</sup>Cleveland Clinic Burkhardt Brain Tumor and Neuro-Oncology Center, Cleveland, OH, USA, <sup>4</sup>University of California, Los Angeles, Los Angeles, CA, USA, <sup>5</sup>Ontario Brain Institute, Toronto, ON, Canada, <sup>6</sup>Tocagen Inc., San Diego, CA, USA

Toca 511 (vocimagene amiretroprepvec) is an investigational, conditionally lytic, retroviral replicating vector that encodes an optimized yeast cytosine deaminase (CD) gene. The CD gene converts the prodrug, Toca FC (investigational, extended-release 5-fluorocytosine), into the chemotherapeutic, 5-FU in infected tumors. In a Phase 1 study (NCT01985256), Toca 511 was injected intravenously for 1, 3, or 5 days to patients with recurrent high grade glioma. Tumors were subsequently resected, and Toca 511 was injected into the resection cavity walls. At the time of resection, tissue from various regions of the tumor was collected and processed for quantitative PCR analysis of CD RNA and DNA. Tissue from corresponding locations was fixed for assessment of CD protein expression by immunohistochemistry (IHC). Expression of CD protein was quantified based
